# Supplementary material for: Ultra-low formation of octahydrophenazine in the Beckmann rearrangement of cyclohexanone oxime using a microreactor
Source: Royal Society of Chemistry journal article supplement (doi:10.1039/c9re00246d), 2019-01-01
Supplement: c9re00246d1.pdf [file c9re00246d1.pdf]

# Ultra-low Formation of Octahydrophenazine in Beckmann Rearrangement of Cyclohexanone Oxime using a Microreactor

Chencan Du, Yunpeng Hu, Jisong Zhang, Guangsheng Luo\*

*The State Key Laboratory of Chemical Engineering, Department of Chemical  
Engineering, Tsinghua University, Beijing 100084, China*

## Table of Contents

|                                                                  |    |
|------------------------------------------------------------------|----|
| 1. Eliminating the effect of mixing.....                         | S2 |
| 1.1 Experiment .....                                             | S2 |
| 1.2 Results and discussion.....                                  | S2 |
| 2. Comparison of different bases in the neutralization step..... | S3 |
| 2.1 Materials.....                                               | S3 |
| 2.2 Results and discussion.....                                  | S3 |
| References .....                                                 | S5 |

---

\* Corresponding author.

Tel.: +86 62 783 870; fax: +86 62 783 870.

E-mail address: gsluo@tsinghua.edu.cn (G. S. Luo)

## 1. Eliminating the effect of mixing

### 1.1 Experiment

Figure S1 shows the experiment setup for the measurement of the reaction conversion. Different from the setup in Figure 1, another metering pump that delivered water was used to terminate the reaction together with a ice-water bath. The other adopted devices were as same as Figure 1. Different lengths of delay loops were employed to control the residence time at different flow rates. In order to decrease the temperature rise, 90% amount of the desired cyclohexanone oxime (CHO) was replaced by caprolactam (CPL).

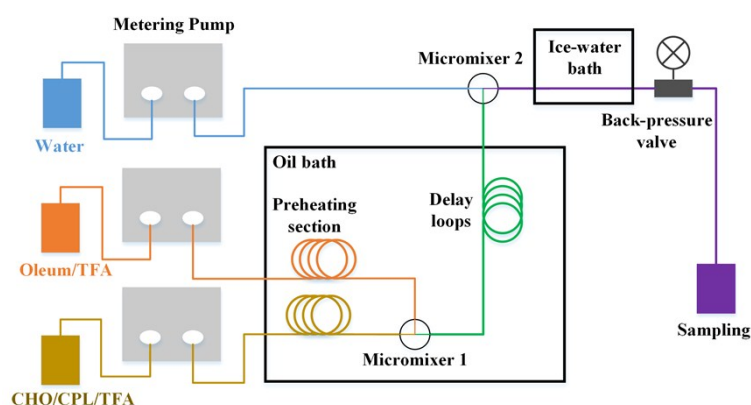

Figure S1. Schematic overview of the experimental setup

0.25 g of the obtained sample was analyzed as following: firstly, the pH was adjusted to 7 by 10 M NaOH solution and then it was extracted by 2 mL dichloromethane. The organic phase was analyzed by GC with the same method. The conversion was calculated by Eq. S1 based on the amount of CHO.

$$X_{\text{CHO}}(\%) = \left(1 - \frac{m_{\text{CHO}}}{m_{\text{CHO0}}}\right) \times 100 \quad (\text{S1})$$

### 1.2 Results and discussion

The mixing performance of adopted T-type micromixer has been described in our

previous study<sup>1</sup> and the segregation indexes,  $X_S$ , were found in the range of  $10^{-2}$  to  $10^{-3}$ . In order to guarantee the adequate mixing, we investigated the effect of flow rates on the reaction conversion, as outlined in Figure S2. The conversion of CHO increased with the increase of the volume flow rate ( $Q_C$ ) at low range ( $< 5$  mL/min) and tended to be constant with  $Q_C$  larger than 5 mL/min. Thus,  $Q_C$  was set at  $> 7.5$  mL/min for further experiments to decrease the effect of mixing.

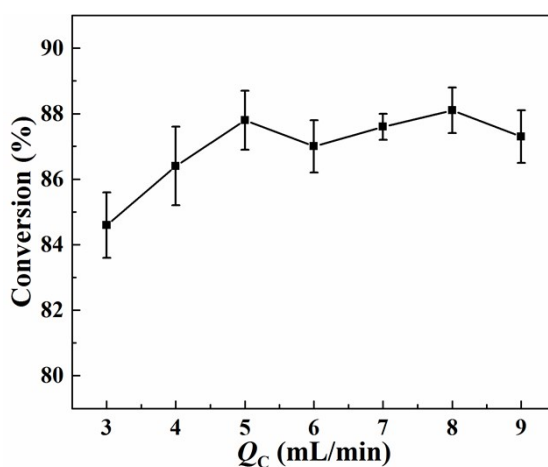

Figure S2. Effect of volume flow rate on the reaction conversion at 30 s. Run conditions:  $T = 80$  °C, T/A ratio: 7.5, A/O ratio: 1.0,  $SO_3$  mass fraction: 10%,  $D(TFA) = 0.2$ .  $Q_C$ : volume flow rate of continuous fluid.

## 2. Comparison of different bases in the neutralization step

### 2.1 Materials

Calcium hydroxide ( $>95\%$ ) was purchased from Sinopharm Chemical Reagent Co., Ltd, and dimethylamine (AR, 40wt.% in  $H_2O$ ) was purchased from Aladdin Industrial Corporation.

### 2.2 Results and discussion

Calcium hydroxide ( $Ca(OH)_2$ ) and dimethylamine (DMA), were chosen as the

typical inorganic and organic bases. The results were shown in Table 1. For the inorganic bases (entries 2&3), the contents of OHP and other two light impurities (2-CYO and 2-HCO) were similar. The content of OHP neutralized by DMA (entry 4) was similar to the inorganic bases but much lower than ammonia (entry 1), verifying that OHP, which was produced in the neutralization process, was mainly due to the using of NH<sub>3</sub>. However, the contents of light impurities obtained by DMA were higher than NH<sub>3</sub> (entry 1) but lower than NaOH and Ca(OH)<sub>2</sub> (entries 2&3), which was mainly due to the reaction between DMA and reaction intermediates. The difference between DMA and NH<sub>3</sub> may be due to the different reaction activity. Although the reaction products failed to be isolated by GC, the trends that light impurities decreased neutralized by DMA compared to inorganic bases also confirmed the reaction between reaction intermediates and the neutralization reagent.

Table 1. Effect of different bases in the neutralization process on the OHP content. Run conditions of the reaction: Temperature: 80 °C, SO<sub>3</sub> mass fraction: 10%, T/A ratio: 7.5, A/O ratio: 0.8, D(TFA): 0.2. The pH value in the neutralization: 7.0.

| Entry | Base                             | 2-CYO (%) | 2-HCO (%) | OHP (ppm) |
|-------|----------------------------------|-----------|-----------|-----------|
| 1     | Ammonia                          | 0.021     | 0.028     | 142       |
| 2     | 10 mol/L NaOH                    | 0.12      | 0.091     | 57        |
| 3     | Ca(OH) <sub>2</sub> <sup>a</sup> | 0.11      | 0.087     | 58        |
| 4     | Dimethylamine                    | 0.064     | 0.054     | 54        |

<sup>a</sup> The corresponding amount of water was calculated by entry 2 based on the concentration of OH<sup>-</sup>

and pre-added in the liquid product.  $\text{Ca}(\text{OH})_2$  was then added as solid.

## References

1. J. S. Zhang, K. Wang, Y. C. Lu and G. S. Luo, *Chem. Eng. Process*, 2010, 49, 740-747.
